# Supplementary material for: Determination of Post-Harvest Biochemical Composition, Enzymatic Activities, and Oxidative Browning in 14 Apple Cultivars
Source: PubMed Central journal article supplement (PMC7831482; doi:10.3390/foods10010186), 2021-01-18
Supplement: foods-10-00186-s001.pdf [file foods-10-00186-s001.pdf]

Supplementary Materials:

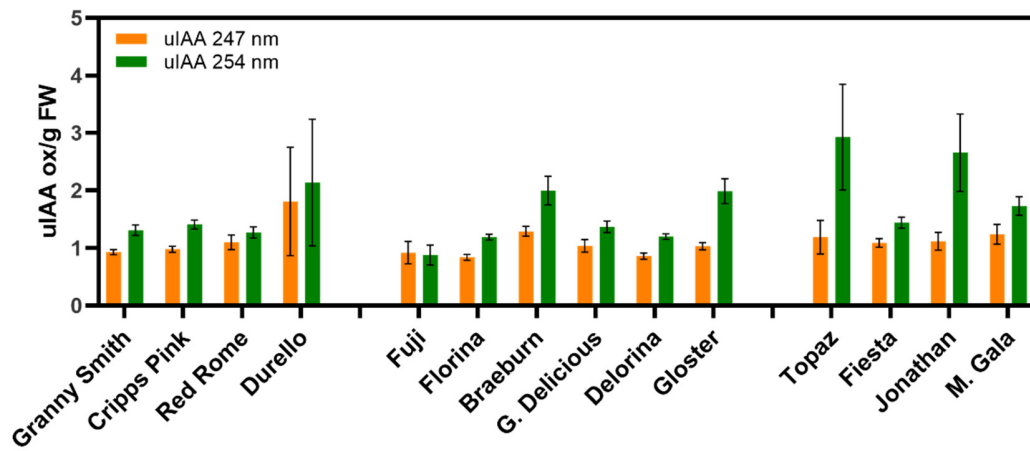

**Figure S1.** Average enzyme activity for IAAox (in IAAox units/g FW) at two different wavelengths (247 nm and 254 nm) for each cultivar. The means displayed are averages from all three times. Means  $\pm$  standard error displayed. No significant differences were detected across cultivars according to Tukey's HSD post-hoc mean comparison at  $p < 0.05$ .

**Table S1.** Phenolic compound concentrations within each cultivar at each time point post-slicing (T0, T1, T2). Cultivars are presented in the same order as in Figure 1 based on their level of flesh browning: minimal browning (first 4 cultivars), moderate browning (portion of table shaded in gray), and severe browning (last 4 cultivars).

| Cultivar       | Catechin<br>(mg/g FW) |              |              | Epicatechin<br>(mg/g FW) |             |             | Chlorogenic<br>acid<br>(mg/g FW) |             |             | <i>p</i> -Coumaric acid<br>(mg/g FW) |              |              | Phloridzin<br>(mg/g FW) |              |              | Proanthocyanidins<br>(mg/g FW) |             |             |
|----------------|-----------------------|--------------|--------------|--------------------------|-------------|-------------|----------------------------------|-------------|-------------|--------------------------------------|--------------|--------------|-------------------------|--------------|--------------|--------------------------------|-------------|-------------|
|                | T0                    | T1           | T2           | T0                       | T1          | T2          | T0                               | T1          | T2          | T0                                   | T1           | T2           | T0                      | T1           | T2           | T0                             | T1          | T2          |
| 'G. Smith'     | 0.026                 | 0.026        | 0.025        | 0.03                     | 0.07        | 0.07        | <b>0.02</b>                      | <b>0.03</b> | <b>0.04</b> | 0.002                                | <b>0.002</b> | 0.002        | 0.004                   | 0.004        | 0.005        | 0.35                           | 0.42        | 0.34        |
| 'Cripps Pink'  | 0.003                 | 0.003        | 0.004        | 0.05                     | 0.04        | 0.05        | 0.14                             | 0.14        | 0.18        | 0.002                                | 0.002        | 0.003        | 0.003                   | 0.004        | 0.003        | 0.21                           | 0.22        | 0.23        |
| 'Red Rome'     | 0.012                 | 0.007        | 0.012        | 0.05                     | 0.05        | 0.06        | <b>0.23</b>                      | <b>0.23</b> | <b>0.30</b> | 0.004                                | 0.005        | 0.006        | 0.004                   | 0.005        | 0.005        | 0.26                           | 0.28        | 0.29        |
| 'Durello'      | <b>0.057</b>          | <b>0.040</b> | <b>0.050</b> | 0.07                     | <b>0.07</b> | 0.09        | 0.03                             | 0.03        | 0.04        | 0.006                                | 0.005        | 0.007        | 0.005                   | 0.005        | 0.007        | 0.37                           | <b>0.46</b> | 0.45        |
| 'Fuji'         | 0.011                 | 0.012        | 0.008        | 0.06                     | 0.05        | 0.08        | 0.21                             | 0.17        | 0.21        | 0.005                                | 0.005        | 0.007        | <b>0.012</b>            | 0.010        | <b>0.019</b> | 0.37                           | 0.29        | 0.44        |
| 'Florina'      | 0.004                 | 0.007        | 0.006        | 0.04                     | 0.04        | <b>0.04</b> | 0.04                             | 0.04        | 0.07        | <b>0.001</b>                         | -            | <b>0.002</b> | 0.005                   | 0.006        | 0.008        | 0.24                           | 0.18        | 0.22        |
| 'Braeburn'     | <b>0.003</b>          | 0.004        | <b>0.003</b> | 0.04                     | 0.04        | 0.05        | 0.09                             | 0.10        | 0.13        | <b>0.010</b>                         | 0.011        | 0.011        | 0.004                   | 0.005        | 0.006        | 0.18                           | <b>0.16</b> | <b>0.20</b> |
| 'G. Delicious' | 0.004                 | -            | 0.008        | 0.05                     | 0.04        | 0.06        | 0.10                             | 0.11        | 0.13        | 0.008                                | 0.008        | 0.008        | 0.006                   | 0.008        | 0.009        | <b>0.44</b>                    | 0.24        | 0.42        |
| 'Delorina'     | 0.009                 | <b>0.002</b> | 0.010        | 0.05                     | 0.05        | 0.06        | 0.06                             | 0.09        | 0.08        | -                                    | -            | -            | 0.009                   | <b>0.013</b> | 0.012        | 0.41                           | 0.44        | 0.42        |
| 'Gloster'      | 0.009                 | 0.006        | 0.019        | 0.04                     | <b>0.03</b> | 0.05        | 0.17                             | 0.20        | 0.26        | 0.009                                | 0.006        | 0.010        | 0.007                   | 0.009        | 0.010        | 0.19                           | 0.15        | 0.21        |
| 'Topaz'        | 0.017                 | 0.006        | 0.015        | <b>0.07</b>              | 0.07        | <b>0.10</b> | 0.08                             | 0.10        | 0.10        | -                                    | -            | -            | 0.003                   | 0.003        | <b>0.003</b> | 0.41                           | 0.30        | <b>0.62</b> |
| 'Fiesta'       | -                     | -            | 0.015        | <b>0.03</b>              | 0.04        | 0.05        | 0.20                             | 0.21        | 0.26        | 0.003                                | 0.003        | 0.003        | <b>0.002</b>            | <b>0.003</b> | 0.003        | <b>0.14</b>                    | 0.19        | 0.32        |
| 'Jonathan'     | 0.020                 | 0.013        | 0.024        | 0.06                     | 0.06        | 0.08        | 0.06                             | 0.07        | 0.08        | 0.005                                | 0.004        | 0.005        | 0.005                   | 0.004        | 0.005        | 0.30                           | 0.25        | 0.44        |
| 'M. Gala'      | 0.020                 | 0.014        | 0.026        | 0.06                     | 0.07        | 0.08        | 0.16                             | 0.16        | 0.17        | 0.009                                | <b>0.011</b> | <b>0.011</b> | 0.005                   | 0.007        | 0.005        | 0.39                           | 0.30        | 0.45        |
| LSD            | 0.035                 |              |              | 0.06                     |             |             | 0.21                             |             |             | nd                                   |              |              | nd                      |              |              | 0.41                           |             |             |

In each column, bold highlights the highest and lowest values in each column. All means (cultivar × time (T0, T1, T2)) for each phenolic compound compared by Tukey HSD at  $p < 0.05$ . LSD = least significant difference as determined by Tukey HSD; means with values larger than LSD indicates significance at  $p < 0.05$ ; nd = no difference at  $p < 0.05$ .

**Table S2.** The standard deviation of phenolic compound concentrations to associate to the corresponding mean value in Table S1 within each cultivar at each time point post-slicing (T0, T1, T2). Cultivars are presented in the same order as in Figure 1 based on their level of flesh browning: minimal browning (first 4 cultivars), moderate browning (portion of table shaded in gray), and severe browning (last 4 cultivars).

| Cultivar       | Catechin<br>(mg/g FW) |       |       | Epicatechin<br>(mg/g FW) |       |       | Chlorogenic acid<br>(mg/g FW) |       |       | <i>p</i> -Coumaric acid<br>(mg/g FW) |       |       | Phloridzin<br>(mg/g FW) |       |       | Proanthocyanidins<br>(mg/g FW) |       |       |
|----------------|-----------------------|-------|-------|--------------------------|-------|-------|-------------------------------|-------|-------|--------------------------------------|-------|-------|-------------------------|-------|-------|--------------------------------|-------|-------|
|                | T0                    | T1    | T2    | T0                       | T1    | T2    | T0                            | T1    | T2    | T0                                   | T1    | T2    | T0                      | T1    | T2    | T0                             | T1    | T2    |
| 'G. Smith'     | 0.010                 | 0.002 | 0.001 | 0.033                    | 0.011 | 0.022 | 0.008                         | 0.021 | 0.000 | 0.000                                | 0.000 | 0.000 | 0.001                   | 0.000 | 0.000 | 0.163                          | 0.034 | 0.078 |
| 'Cripps Pink'  | 0.004                 | 0.004 | 0.006 | 0.002                    | 0.006 | 0.013 | 0.040                         | 0.057 | 0.063 | 0.000                                | 0.000 | 0.000 | 0.000                   | 0.001 | 0.001 | 0.045                          | 0.014 | 0.019 |
| 'Red Rome'     | 0.000                 | 0.010 | 0.002 | 0.006                    | 0.002 | 0.012 | 0.017                         | 0.027 | 0.069 | 0.000                                | 0.000 | 0.002 | 0.000                   | 0.001 | 0.001 | 0.059                          | 0.063 | 0.057 |
| 'Durello'      | 0.024                 | 0.005 | 0.016 | 0.021                    | 0.015 | 0.006 | 0.008                         | 0.019 | 0.007 | 0.000                                | 0.002 | 0.002 | 0.001                   | 0.001 | 0.000 | 0.103                          | 0.143 | 0.045 |
| 'Fuji'         | 0.016                 | 0.004 | 0.012 | 0.009                    | 0.017 | 0.035 | 0.028                         | 0.052 | 0.020 | 0.001                                | 0.002 | 0.001 | 0.004                   | 0.001 | 0.007 | 0.037                          | 0.057 | 0.007 |
| 'Florina'      | 0.005                 | 0.002 | 0.009 | 0.005                    | 0.017 | 0.004 | 0.025                         | 0.009 | 0.072 | 0.001                                | 0.001 | 0.002 | 0.001                   | 0.001 | 0.001 | 0.043                          | 0.055 | 0.007 |
| 'Braeburn'     | 0.004                 | 0.006 | 0.004 | 0.010                    | 0.002 | 0.015 | 0.001                         | 0.026 | 0.006 | 0.001                                | 0.002 | 0.000 | 0.000                   | 0.001 | 0.000 | 0.001                          | 0.028 | 0.019 |
| 'G. Delicious' | 0.005                 | 0.000 | 0.000 | 0.003                    | 0.005 | 0.007 | 0.045                         | 0.047 | 0.061 | 0.000                                | 0.002 | 0.001 | 0.001                   | 0.001 | 0.001 | 0.087                          | 0.021 | 0.065 |
| 'Delorina'     | 0.002                 | 0.003 | 0.003 | 0.003                    | 0.008 | 0.017 | 0.006                         | 0.011 | 0.008 | 0.000                                | 0.000 | 0.000 | 0.002                   | 0.003 | 0.001 | 0.108                          | 0.303 | 0.112 |
| 'Gloster'      | 0.013                 | 0.009 | 0.001 | 0.001                    | 0.000 | 0.001 | 0.028                         | 0.044 | 0.007 | 0.002                                | 0.003 | 0.001 | 0.001                   | 0.000 | 0.001 | 0.025                          | 0.030 | 0.044 |
| 'Topaz'        | 0.010                 | 0.008 | 0.000 | 0.001                    | 0.004 | 0.011 | 0.026                         | 0.057 | 0.042 | 0.000                                | 0.000 | 0.000 | 0.000                   | 0.002 | 0.001 | 0.019                          | 0.092 | 0.031 |
| 'Fiesta'       | 0.000                 | 0.000 | 0.002 | 0.004                    | 0.009 | 0.004 | 0.091                         | 0.119 | 0.152 | 0.001                                | 0.002 | 0.003 | 0.003                   | 0.005 | 0.005 | 0.076                          | 0.114 | 0.188 |
| 'Jonathan'     | 0.004                 | 0.004 | 0.003 | 0.003                    | 0.014 | 0.008 | 0.014                         | 0.029 | 0.026 | 0.001                                | 0.000 | 0.001 | 0.001                   | 0.000 | 0.001 | 0.003                          | 0.056 | 0.059 |
| 'M. Gala'      | 0.006                 | 0.000 | 0.006 | 0.013                    | 0.024 | 0.013 | 0.021                         | 0.030 | 0.069 | 0.000                                | 0.003 | 0.003 | 0.004                   | 0.003 | 0.003 | 0.268                          | 0.121 | 0.089 |

Standard deviation displayed for each cultivar × time (T0, T1, T2) for each phenolic compound.
